# Supplementary material for: Transmission pathways of Campylobacter jejuni between humans and livestock in rural Ethiopia are highly complex and interdependent
Source: Gut Pathog. 2025 May 3;17:26. doi: 10.1186/s13099-025-00691-7 (PMC12049777; doi:10.1186/s13099-025-00691-7)
Supplement: Supplementary file 1 — Additional file 1 [file 13099_2025_691_MOESM1_ESM.xlsx]

## Sheet: Metadata
Isolates tab
hh_id	household id (1-135)
collection_date	date of sample collection (mm/dd/y)
source	source type, two letter code
source_type	Source type, description
tp	time point (approximate age in months for infant isolates; first or second half year of infant life for other samples)
strain	isolate code, made up of hh_id (3 digits), source, time point (2 digits), one letter (A-D) indicating seqeuntial isolate from same sample, one letter indicating primary culturing temparature was 37 (L) or 42 (H) degrees Centigrade
BioSample	NCBI Biosample ID
ST	7-gene Multi Locus Sequence Type
aspA	allele number
glnA	allele number
gltA	allele number
glyA	allele number
pgm	allele number
tkt	allele number
uncA	allele number
cgMLST	core genome Multi Locus Sequence Type
HC_div	diversity code for infant sample
HS_div	diversity code for sibling sample
HM_div	diversity code for mother sample
LB_div	diversity code for cattle sample
LC_div	diversity code for goat sample
LG_div	diversity code for chicken sample
LO_div	diversity sheep for infant sample
HC_seq	code for sequential types in infant samples
HC_tp_diff	time poin t difference between sequential samples
LG_seq	code for sequential types in chicken samples
Samples from the same household are shaded with alternating white or grey colors
Diversity coding system
Letters indicate different ST, numbers indicate different cgSTs among isolates from one sample
Number of isolates differs between samples and is represented by number of different letter/number combinations
For example, A1234 indicates four isolates from one sample with same ST, but all different cgSTs while A12B indicates three isolates from one sample of which two with the same ST but different cgSTs, and one isolate with different ST
Sequential coding system
Isolates from different samples are separated by underscore _
Different letters indicate different STs within or across samples
Different numbers indicate different cgSTs within an ST
Diversity tab
Summary of diversity data
Sequential tab
Summary of seuqential data

## Sheet: Isolates
hh_id	collection_date	source	source_type	tp	strain	BioSample	ST	aspA	glnA	gltA	glyA	pgm	tkt	uncA	cgMLST	HC_div	HS_div	HM_div	LB_div	LC_div	LG_div	LO_div	HC_seq	HC_tp_diff	LG_seq
1	2021-01-26	LG	Chicken	1	001LG01AL	SAMN37735400	849	55	21	27	10	147	37	6	38
2	2020-12-25	LG	Chicken	1	002LG01AL	SAMN37735393	452	7	17	12	2	10	3	6	33
2	2021-12-08	HC	Human_infant	13	002HC13CL	SAMN38791223	14360	14	17	5	2	11	3	972	63	AB
2	2021-10-24	HC	Human_infant	13	002HC13BL	SAMN38791250	305	9	53	2	10	11	3	3	226
7	2022-06-08	LG	Chicken	2	007LG02BH	SAMN38712320	883	2	17	2	3	2	1	5	124
9	2020-12-26	LG	Chicken	1	009LG01AL	SAMN37735409	849	55	21	27	10	147	37	6	36						A12
9	2020-12-26	LG	Chicken	1	009LG01BL	SAMN37735410	849	55	21	27	10	147	37	6	37
9	2020-12-26	HS	Human_sibling	1	009HS01AL	SAMN40454902	2031	9	17	5	10	11	3	3	94		A12
9	2020-12-26	HS	Human_sibling	1	009HS01CL	SAMN40454901	2031	9	17	5	10	11	3	3	96
10	2021-01-01	LG	Chicken	1	010LG01AL	SAMN38842793	49	3	1	5	17	11	11	6	216
12	2022-06-23	LC	Goat	2	012LC02AH	SAMN38712321	2155	2	4	1	25	11	3	5	54
12	2022-06-23	LG	Chicken	2	012LG02BH	SAMN38712322	2100	9	25	2	10	22	3	8	243
12	2021-06-30	HC	Human_infant	7	012HC07AL	SAMN40619972	227	2	4	5	2	2	1	5	257	A123
12	2021-06-30	HC	Human_infant	7	012HC07CL	SAMN40619970	227	2	4	5	2	2	1	5	258
12	2021-06-30	HC	Human_infant	7	012HC07BL	SAMN40619971	227	2	4	5	2	2	1	5	259
13	2022-06-03	LG	Chicken	2	013LG02AH	SAMN38842794	5326	188	313	5	2	89	5	6	31
13	2021-12-08	HC	Human_infant	13	013HC13AL	SAMN37735443	6839	9	481	42	10	11	9	253	240
14	2021-01-23	LG	Chicken	1	014LG01AL	SAMN38712323	227	2	4	5	2	2	1	5	251
16	2022-06-03	LB	Cattle	2	016LB02AH	SAMN40208065	305	9	53	2	10	11	3	3	221
20	2021-08-25	HC	Human_infant	9	020HC09CL	SAMN40619969	14404	2	4	382	2	2	1	5	265	A12
20	2021-08-25	HC	Human_infant	9	020HC09BL	SAMN40619968	14404	2	4	382	2	2	1	5	266
24	2022-01-06	LG	Chicken	1	024LG01AL	SAMN40619994	356	14	17	5	2	11	3	6	65										A_B
24	2022-05-20	LG	Chicken	2	024LG02AH	SAMN38712324	1723	8	17	2	2	11	12	6	4
25	2022-05-14	LG	Chicken	1	025LG01AH	SAMN40208049	881	9	17	52	10	10	3	1	19										A_B
25	2022-06-08	LG	Chicken	2	025LG02AL	SAMN38347659	14350	9	17	5	10	11	1164	3	105
25	2021-10-13	HC	Human_infant	10	025HC10CL	SAMN37735460	1751	1	2	5	4	5	9	3	142	A12
25	2021-10-13	HC	Human_infant	10	025HC10AL	SAMN37735462	1751	1	2	5	4	5	9	3	143
29	2021-11-08	HC	Human_infant	11	029HC11BL	SAMN40454873	883	2	17	2	3	2	1	5	138	A12							A1B1_A1B2	2
29	2021-11-08	HC	Human_infant	11	029HC11AL	SAMN40208064	50	2	1	12	3	2	1	5	152
29	2022-01-14	HC	Human_infant	13	029HC13AL	SAMN38815300	883	2	17	2	3	2	1	5	138	A12
29	2022-01-14	HC	Human_infant	13	029HC13BL	SAMN37735427	50	2	1	12	3	2	1	5	151
31	2021-02-25	LC	Goat	1	031LC01CL	SAMN38183156	19	2	1	5	3	2	1	5	117
31	2021-11-19	LG	Chicken	2	031LG02AL	SAMN38712325	1723	8	17	2	2	11	12	6	167
32	2021-03-25	LG	Chicken	1	032LG01AL	SAMN37735411	19	2	1	5	3	2	1	5	115										A_AB
32	2022-05-31	LG	Chicken	2	032LG02AL	SAMN40454860	5326	188	313	5	2	89	5	6	32						AB
32	2022-05-31	LG	Chicken	2	032LG02AH	SAMN40208054	19	2	1	5	3	2	1	5	115
32	2022-05-31	LC	Goat	2	032LC02AH	SAMN40208056	305	9	53	2	10	11	3	3	225
32	2021-10-13	HC	Human_infant	10	032HC10AL	SAMN37735455	14396	2	55	2	3	2	1	5	123								A_B123	2
32	2021-12-15	HC	Human_infant	12	032HC12AL	SAMN38815296	362	1	2	49	4	11	66	8	11	A123
32	2021-12-15	HC	Human_infant	12	032HC12CL	SAMN38815294	362	1	2	49	4	11	66	8	13
32	2021-12-15	HC	Human_infant	12	032HC12BL	SAMN38815295	362	1	2	49	4	11	66	8	14
33	2021-03-25	LG	Chicken	1	033LG01AL	SAMN37735412	2100	9	25	2	10	22	3	8	241
33	2022-05-31	LG	Chicken	2	033LG02AH	SAMN38712328	14422	14	17	12	2	11	3	6	62						AB				A_AB
33	2022-05-31	LG	Chicken	2	033LG02BH	SAMN38712329	2100	9	25	2	10	22	3	8	242
33	2021-09-22	HC	Human_infant	9	033HC09AL	SAMN38815200	353	7	17	5	2	10	3	6	81	A123							A123_B123	3
33	2021-09-22	HC	Human_infant	9	033HC09BL	SAMN38815201	353	7	17	5	2	10	3	6	83
33	2021-09-22	HC	Human_infant	9	033HC09CL	SAMN38815202	353	7	17	5	2	10	3	6	84
33	2021-12-15	HC	Human_infant	12	033HC12CL	SAMN38816231	2042	2	2	42	4	90	25	8	178	A123
33	2021-12-15	HC	Human_infant	12	033HC12AL	SAMN40454875	2042	2	2	42	4	90	25	8	179
33	2021-12-15	HC	Human_infant	12	033HC12BL	SAMN40454876	2042	2	2	42	4	90	25	8	182
35	2021-03-24	HS	Human_sibling	1	035HS01BL	SAMN40454911	1365	24	2	2	15	23	3	12	169
35	2021-10-15	HM	Human_mother	2	035HM02CL	SAMN40619987	849	55	21	27	10	147	37	6	44			A123
35	2021-10-15	HM	Human_mother	2	035HM02AL	SAMN40619985	849	55	21	27	10	147	37	6	45
35	2021-10-15	HM	Human_mother	2	035HM02BL	SAMN40619986	849	55	21	27	10	147	37	6	47
35	2022-06-22	LG	Chicken	2	035LG02AL	SAMN40208067	353	7	17	5	2	10	3	6	236
35	2022-06-22	LC	Goat	2	035LC02BH	SAMN38842796	353	7	17	5	2	10	3	6	237					A12
35	2022-06-22	LC	Goat	2	035LC02CH	SAMN40208051	353	7	17	5	2	10	3	6	238
37	2021-03-20	LG	Chicken	1	037LG01AL	SAMN38842797	362	1	2	49	4	11	66	8	7
37	2021-11-03	HC	Human_infant	11	037HC11BL	SAMN38791226	436	7	21	5	62	4	61	44	68	A12
37	2021-11-03	HC	Human_infant	11	037HC11CL	SAMN38791225	436	7	21	5	62	4	61	44	72
42	2021-12-15	HC	Human_infant	12	042HC12BL	SAMN38815302	50	2	1	12	3	2	1	5	260	A12							A12_B123	1
42	2021-12-15	HC	Human_infant	12	042HC12AL	SAMN38815301	50	2	1	12	3	2	1	5	261
42	2022-01-26	HC	Human_infant	13	042HC13AL	SAMN38183181	1723	8	17	2	2	11	12	6	1	A123
42	2022-01-26	HC	Human_infant	13	042HC13BL	SAMN38183182	1723	8	17	2	2	11	12	6	2
42	2022-01-26	HC	Human_infant	13	042HC13CL	SAMN38183183	1723	8	17	2	2	11	12	6	3
44	2021-04-29	LG	Chicken	1	044LG01AL	SAMN38713229	1038	8	10	5	2	11	12	6	203										A_B
45	2022-01-20	LG	Chicken	2	045LG02AL	SAMN37735420	2109	4	7	10	4	10	7	1	76
45	2022-01-20	LC	Goat	2	045LC02CL	SAMN37735425	1038	8	10	5	2	11	12	6	206
45	2021-10-27	HC	Human_infant	10	045HC10AL	SAMN38816101	2155	2	4	1	25	11	3	5	55	A123
45	2021-10-27	HC	Human_infant	10	045HC10CL	SAMN38816103	2155	2	4	1	25	11	3	5	56
45	2021-10-27	HC	Human_infant	10	045HC10BL	SAMN38816102	2155	2	4	1	25	11	3	5	57
46	2022-01-18	LG	Chicken	2	046LG02AL	SAMN38183153	362	1	2	49	4	11	66	8	6
46	2021-08-05	HC	Human_infant	7	046HC07AL	SAMN37735458	1751	1	2	5	4	5	9	3	144	A123
46	2021-08-05	HC	Human_infant	7	046HC07BL	SAMN37735449	1751	1	2	5	4	5	9	3	145
46	2022-01-19	HC	Human_infant	13	046HC13BL	SAMN37735426	362	1	2	49	4	11	66	8	6
47	2021-12-15	HC	Human_infant	12	047HC12CL	SAMN38183189	2042	2	2	42	4	90	25	8	175	A12
47	2021-12-15	HC	Human_infant	12	047HC12AL	SAMN38183187	2042	2	2	42	4	90	25	8	176
48	2022-01-18	LG	Chicken	2	048LG02AL	SAMN38183149	1723	8	17	2	2	11	12	6	165						A12
48	2022-01-18	LG	Chicken	2	048LG02BL	SAMN38183150	1723	8	17	2	2	11	12	6	168
48	2021-11-19	HC	Human_infant	11	048HC11BL	SAMN38791241	2042	2	2	42	4	90	25	8	180
49	2021-03-19	LG	Chicken	1	049LG01AL	SAMN37735405	49	3	1	5	17	11	11	6	213
49	2021-09-09	HS	Human_sibling	2	049HS02CL	SAMN40454914	3621	2	298	42	2	2	1	5	150
52	2021-10-16	HS	Human_sibling	2	052HS02BL	SAMN40619977	1038	8	10	5	2	11	12	6	198		A12
52	2021-10-16	HS	Human_sibling	2	052HS02AL	SAMN40619978	1038	8	10	5	2	11	12	6	199
52	2022-01-26	HC	Human_infant	13	052HC13AL	SAMN40620013	2100	9	25	2	10	22	3	8	244
53	2021-07-08	LG	Chicken	1	053LG01AL	SAMN38842799	2100	9	25	2	10	22	3	8	246
53	2021-12-30	LG	Chicken	2	053LG02BL	SAMN38713231	14423	9	17	52	10	10	3	5	20						AB
53	2021-12-30	LG	Chicken	2	053LG02AL	SAMN38713230	436	7	21	5	62	4	61	44	70
53	2021-08-13	HC	Human_infant	7	053HC07CL	SAMN38183178	1365	24	2	2	15	23	3	12	170	A12							A12_B	3
53	2021-08-13	HC	Human_infant	7	053HC07AL	SAMN38183180	1365	24	2	2	15	23	3	12	171								B_C123	1
53	2021-11-03	HC	Human_infant	10	053HC10CL	SAMN38183168	436	7	21	5	62	4	61	44	69
53	2021-12-01	HC	Human_infant	11	053HC11BL	SAMN40454868	14423	9	17	52	10	10	3	5	22	A123
53	2021-12-01	HC	Human_infant	11	053HC11AL	SAMN38791222	14423	9	17	52	10	10	3	5	23
53	2021-12-01	HC	Human_infant	11	053HC11CL	SAMN38791221	14423	9	17	52	10	10	3	5	24
54	2021-07-08	LG	Chicken	1	054LG01BL	SAMN37735398	1723	8	17	2	2	11	12	6	140						A12
54	2021-07-08	LG	Chicken	1	054LG01AL	SAMN37735399	1723	8	17	2	2	11	12	6	141
54	2021-03-16	HS	Human_sibling	1	054HS01AL	SAMN40454886	227	2	4	5	2	2	1	5	253		A12
54	2021-03-16	HS	Human_sibling	1	054HS01BL	SAMN40454885	227	2	4	5	2	2	1	5	254
55	2021-02-27	LG	Chicken	1	055LG01BL	SAMN40454887	849	55	21	27	10	147	37	6	46
56	2022-02-02	HC	Human_infant	13	056HC13AL	SAMN40454893	362	1	2	49	4	11	66	8	8	A123
56	2022-02-02	HC	Human_infant	13	056HC13CL	SAMN40454895	362	1	2	49	4	11	66	8	9
56	2022-02-02	HC	Human_infant	13	056HC13BL	SAMN40454894	362	1	2	49	4	11	66	8	10
57	2021-10-23	LC	Goat	2	057LC02CL	SAMN38183155	883	2	17	2	3	2	1	5	125
59	2021-12-04	LG	Chicken	2	059LG02BL	SAMN38713232	2100	9	25	2	10	22	3	8	245
59	2021-10-08	HC	Human_infant	9	059HC09CL	SAMN37735454	436	7	21	5	62	4	61	44	67
59	2021-12-05	HC	Human_infant	11	059HC11BL	SAMN38791236	5596	10	17	2	10	11	227	5	17
59	2021-12-05	HC	Human_infant	11	059HC11CL	SAMN38791235	5596	10	17	2	10	11	227	5	18
60	2022-01-13	LG	Chicken	2	060LG02AL	SAMN37735421	49	3	1	5	17	11	11	6	212
60	2022-01-14	HC	Human_infant	12	060HC12CL	SAMN38816131	523	2	4	1	93	11	3	6	35
62	2022-01-12	LG	Chicken	1	062LG01AL	SAMN38183154	19	2	1	5	3	2	1	5	111
62	2022-02-09	HC	Human_infant	13	062HC13AL	SAMN40619979	849	55	21	27	10	147	37	6	41
64	2021-10-06	HS	Human_sibling	2	064HS02CL	SAMN40620007	403	10	27	16	19	10	5	7	195		A123
64	2021-10-06	HS	Human_sibling	2	064HS02AL	SAMN40620005	403	10	27	16	19	10	5	7	196
64	2021-10-06	HS	Human_sibling	2	064HS02BL	SAMN40620006	403	10	27	16	19	10	5	7	197
64	2021-12-29	HC	Human_infant	11	064HC11AL	SAMN37735446	4624	3	1	5	10	11	68	6	217	A123							A123_B	2
64	2021-12-29	HC	Human_infant	11	064HC11BL	SAMN37735445	4624	3	1	5	10	11	68	6	218
64	2021-12-29	HC	Human_infant	11	064HC11CL	SAMN37735444	4624	3	1	5	10	11	68	6	219
64	2022-02-18	HC	Human_infant	13	064HC13BL	SAMN40454913	849	55	21	27	10	147	37	6	41
65	2021-11-19	HC	Human_infant	10	065HC10CL	SAMN38791231	2042	2	2	42	4	90	25	8	187								A_B12	1
65	2021-12-15	HC	Human_infant	11	065HC11BL	SAMN38816236	2042	2	2	42	4	90	25	8	186	A12
65	2021-12-15	HC	Human_infant	11	065HC11CL	SAMN38816237	2042	2	2	42	4	90	25	8	188
66	2021-11-14	HC	Human_infant	10	066HC10CL	SAMN40454877	4624	3	1	5	10	11	68	6	220								A_B	1
66	2021-12-12	HC	Human_infant	11	066HC11AL	SAMN38791220	2042	2	2	42	4	90	25	8	194
67	2022-02-24	LB	Cattle	1	067LB01BL	SAMN38092510	353	7	17	5	2	10	3	6	81				A12
67	2022-02-24	LG	Chicken	1	067LG01AH	SAMN38712332	353	7	17	5	2	10	3	6	82
67	2022-02-24	LB	Cattle	1	067LB01CL	SAMN38092511	353	7	17	5	2	10	3	6	85
67	2021-12-29	HC	Human_infant	11	067HC11CL	SAMN38815044	2031	9	17	5	10	11	3	3	102	A12B
67	2021-12-29	HC	Human_infant	11	067HC11BL	SAMN38816100	2031	9	17	5	10	11	3	3	106
67	2021-12-29	HC	Human_infant	11	067HC11AL	SAMN38816099	883	2	17	2	3	2	1	5	139
69	2021-11-03	HS	Human_sibling	2	069HS02CL	SAMN40619963	19	2	1	5	3	2	1	5	107		A12
69	2021-11-03	HS	Human_sibling	2	069HS02BL	SAMN40619962	19	2	1	5	3	2	1	5	108
70	2021-12-01	HC	Human_infant	10	070HC10AL	SAMN38815838	14404	2	4	382	2	2	1	5	267	A123							A123_B	3
70	2021-12-01	HC	Human_infant	10	070HC10CL	SAMN38815207	14404	2	4	382	2	2	1	5	268
70	2021-12-01	HC	Human_infant	10	070HC10BL	SAMN38815289	14404	2	4	382	2	2	1	5	269
70	2021-12-08	HC	Human_infant	13	070HC13CL	SAMN38791251	14360	14	17	5	2	11	3	972	64
72	2022-02-18	HC	Human_infant	13	072HC13AL	SAMN40619993	227	2	4	5	2	2	1	5	255	A12
72	2022-02-18	HC	Human_infant	13	072HC13CL	SAMN40619991	227	2	4	5	2	2	1	5	256
73	2021-07-16	LG	Chicken	1	073LG01CL	SAMN37735397	436	7	21	5	62	4	61	44	71
73	2021-11-03	HC	Human_infant	9	073HC09CL	SAMN38791234	14423	9	17	52	10	10	3	5	20	A12B							A12B_C123	2
73	2021-11-03	HC	Human_infant	9	073HC09AL	SAMN38791232	14423	9	17	52	10	10	3	5	21								C123_A1B	2
73	2021-11-03	HC	Human_infant	9	073HC09BL	SAMN38791233	50	2	1	12	3	2	1	5	160
73	2021-12-31	HC	Human_infant	11	073HC11BL	SAMN38816225	2031	9	17	5	10	11	3	3	100	A123
73	2021-12-31	HC	Human_infant	11	073HC11AL	SAMN38816226	2031	9	17	5	10	11	3	3	102
73	2021-12-31	HC	Human_infant	11	073HC11CL	SAMN38816224	2031	9	17	5	10	11	3	3	103
73	2022-02-18	HC	Human_infant	13	073HC13BL	SAMN38791267	14423	9	17	52	10	10	3	5	20	AB
73	2022-02-18	HC	Human_infant	13	073HC13AL	SAMN38791266	50	2	1	12	3	2	1	5	160
74	2022-02-18	LG	Chicken	2	074LG02BH	SAMN38842801	849	55	21	27	10	147	37	6	39
74	2021-11-10	HC	Human_infant	9	074HC09BL	SAMN37735433	19	2	1	5	3	2	1	5	119	A1234
74	2021-11-10	HC	Human_infant	9	074HC09CL	SAMN37735434	19	2	1	5	3	2	1	5	120
74	2021-12-01	HC	Human_infant	10	074HC10CL	SAMN38791229	19	2	1	5	3	2	1	5	121
74	2021-12-01	HC	Human_infant	10	074HC10BL	SAMN40454869	19	2	1	5	3	2	1	5	122
75	2021-12-09	LG	Chicken	2	075LG02BL	SAMN38713236	56	2	4	27	25	11	3	5	59
76	2021-11-11	LG	Chicken	1	076LG01AL	SAMN38712335	2031	9	17	5	10	11	3	3	93						AB
76	2022-01-06	LG	Chicken	2	076LG02AL	SAMN38713237	50	2	1	12	3	2	1	5	159
78	2022-01-16	HC	Human_infant	11	078HC11CL	SAMN40454865	883	2	17	2	3	2	1	5	136	A12							A12_B123	2
78	2022-01-16	HC	Human_infant	11	078HC11BL	SAMN40454866	883	2	17	2	3	2	1	5	137
78	2022-03-06	HC	Human_infant	13	078HC13AL	SAMN40620010	50	2	1	12	3	2	1	5	162	A123
78	2022-03-06	HC	Human_infant	13	078HC13CL	SAMN40620008	50	2	1	12	3	2	1	5	163
78	2022-03-06	HC	Human_infant	13	078HC13BL	SAMN40620009	50	2	1	12	3	2	1	5	164
81	2022-03-03	LG	Chicken	2	081LG02AH	SAMN38712336	1038	8	10	5	2	11	12	6	201						A12
81	2022-03-03	LG	Chicken	2	081LG02BH	SAMN38712337	1038	8	10	5	2	11	12	6	202
81	2021-12-12	HC	Human_infant	10	081HC10AL	SAMN38816221	50	2	1	12	3	2	1	5	155	A123
81	2021-12-12	HC	Human_infant	10	081HC10CL	SAMN38816223	50	2	1	12	3	2	1	5	156
81	2021-12-12	HC	Human_infant	10	081HC10BL	SAMN38816222	50	2	1	12	3	2	1	5	157
82	2021-08-25	HC	Human_infant	6	082HC06CL	SAMN37735440	572	62	4	5	2	2	1	5	247								A_B	2
82	2021-10-15	HC	Human_infant	8	082HC08AL	SAMN40619998	572	62	4	5	2	2	1	5	248
83	2021-04-17	LG	Chicken	1	083LG01AL	SAMN37735401	1723	8	17	2	2	11	12	6	5
84	2022-02-26	LO	Sheep	2	084LO02AH	SAMN38713238	49	3	1	5	17	11	11	6	215
84	2022-02-26	LG	Chicken	2	084LG02AH	SAMN38712338	251	2	1	5	2	2	1	5	239
84	2021-12-31	HC	Human_infant	10	084HC10CL	SAMN38183165	2031	9	17	5	10	11	3	3	99	A123
84	2021-12-31	HC	Human_infant	10	084HC10BL	SAMN38183164	2031	9	17	5	10	11	3	3	101
84	2021-12-31	HC	Human_infant	10	084HC10AL	SAMN38183163	2031	9	17	5	10	11	3	3	104
85	2021-12-03	HC	Human_infant	9	085HC09BL	SAMN38791238	227	2	4	5	2	2	1	5	249	A12
85	2021-12-03	HC	Human_infant	9	085HC09CL	SAMN38791237	227	2	4	5	2	2	1	5	250
86	2022-01-27	LB	Cattle	2	086LB02AL	SAMN38183139	14365	188	313	876	2	89	5	6	27
86	2021-12-29	HC	Human_infant	10	086HC10BL	SAMN38183173	2031	9	17	5	10	11	3	3	97	A12							A12_B123	2
86	2021-12-29	HC	Human_infant	10	086HC10CL	SAMN38183172	2031	9	17	5	10	11	3	3	98
86	2022-02-16	HC	Human_infant	12	086HC12AL	SAMN40454896	3630	9	2	42	4	11	9	253	77	A123
86	2022-02-16	HC	Human_infant	12	086HC12CL	SAMN40454898	3630	9	2	42	4	11	9	253	79
86	2022-02-16	HC	Human_infant	12	086HC12BL	SAMN40454897	3630	9	2	42	4	11	9	253	80
89	2021-04-24	LG	Chicken	1	089LG01AL	SAMN38842803	849	55	21	27	10	147	37	6	40
89	2022-03-19	HC	Human_infant	13	089HC13AL	SAMN38842802	2042	2	2	42	4	90	25	8	177
90	2021-04-14	HS	Human_sibling	1	090HS01BL	SAMN40454906	2155	2	4	1	25	11	3	5	58
90	2021-04-24	LG	Chicken	1	090LG01AL	SAMN37735406	49	3	1	5	17	11	11	6	213
90	2022-02-16	HC	Human_infant	12	090HC12AL	SAMN38791265	883	2	17	2	3	2	1	5	126
92	2022-01-02	HC	Human_infant	10	092HC10BL	SAMN40454903	353	7	17	5	2	10	3	6	234	A12
92	2022-01-02	HC	Human_infant	10	092HC10AL	SAMN40454904	353	7	17	5	2	10	3	6	235
93	2022-01-07	HC	Human_infant	10	093HC10BL	SAMN38816228	362	1	2	49	4	11	66	8	12	A123
93	2022-01-07	HC	Human_infant	10	093HC10AL	SAMN38816229	362	1	2	49	4	11	66	8	15
93	2022-01-07	HC	Human_infant	10	093HC10CL	SAMN38816227	362	1	2	49	4	11	66	8	16
94	2021-12-16	LG	Chicken	2	094LG02BL	SAMN38713240	227	2	4	5	2	2	1	5	252
95	2022-01-04	LG	Chicken	1	095LG01AL	SAMN38183146	19	2	1	5	3	2	1	5	110
95	2022-02-26	LC	Goat	2	095LC02BH	SAMN38712340	2042	2	2	42	4	90	25	8	192					A12
95	2022-02-26	LC	Goat	2	095LC02AH	SAMN38712339	2042	2	2	42	4	90	25	8	193
96	2021-11-10	LG	Chicken	1	096LG01AL	SAMN37735408	19	2	1	5	3	2	1	5	109										A1_2
96	2022-01-04	LG	Chicken	2	096LG02AL	SAMN38092512	19	2	1	5	3	2	1	5	111
98	2021-04-29	LG	Chicken	1	098LG01AL	SAMN38712341	22	1	3	6	4	3	3	3	34
98	2022-01-19	HC	Human_infant	10	098HC10BL	SAMN38816219	3630	9	2	42	4	11	9	253	78
99	2022-03-02	LG	Chicken	1	099LG01AH	SAMN40208060	19	2	1	5	3	2	1	5	116
99	2022-03-02	LG	Chicken	1	099LG01BH	SAMN38712342	883	2	17	2	3	2	1	5	133
99	2021-12-05	HC	Human_infant	7	099HC07AL	SAMN38791247	14424	166	2	1	10	151	1	1	148	A12B
99	2021-10-24	HC	Human_infant	7	099HC07CL	SAMN38791249	305	9	53	2	10	11	3	3	226
99	2021-10-24	HC	Human_infant	7	099HC07BL	SAMN38791248	305	9	53	2	10	11	3	3	227
100	2022-03-02	HS	Human_sibling	2	100HS02BL	SAMN40619960	883	2	17	2	3	2	1	5	134
100	2021-12-09	LB	Cattle	2	100LB02AL	SAMN38183142	1038	8	10	5	2	11	12	6	204				A12
100	2021-12-09	LB	Cattle	2	100LB02CL	SAMN38183140	1038	8	10	5	2	11	12	6	205
100	2021-12-09	LG	Chicken	2	100LG02BL	SAMN38183152	1038	8	10	5	2	11	12	6	210						A12
100	2021-12-09	LG	Chicken	2	100LG02AL	SAMN38183151	1038	8	10	5	2	11	12	6	211
100	2021-12-10	HC	Human_infant	9	100HC09BL	SAMN38791254	14424	166	2	1	10	151	1	1	146	A12							A12_B	3
100	2021-12-10	HC	Human_infant	9	100HC09CL	SAMN38791255	14424	166	2	1	10	151	1	1	147
100	2022-03-02	HC	Human_infant	12	100HC12BL	SAMN40619996	883	2	17	2	3	2	1	5	134
102	2021-10-15	HC	Human_infant	7	102HC07CL	SAMN37735451	436	7	21	5	62	4	61	44	67
104	2021-08-26	HC	Human_infant	5	104HC05CL	SAMN40619956	14407	4	7	10	4	90	7	1	73	A123
104	2021-08-26	HC	Human_infant	5	104HC05AL	SAMN40619958	14407	4	7	10	4	90	7	1	74
104	2021-08-26	HC	Human_infant	5	104HC05BL	SAMN40619957	14407	4	7	10	4	90	7	1	75
105	2021-04-29	HC	Human_infant	1	105HC01BL	SAMN40619983	2042	2	2	42	4	90	25	8	183	A123
105	2021-04-29	HC	Human_infant	1	105HC01CL	SAMN40619984	2042	2	2	42	4	90	25	8	184
105	2021-04-29	HC	Human_infant	1	105HC01AL	SAMN40619982	2042	2	2	42	4	90	25	8	185
105	2022-02-11	LO	Sheep	2	105LO02AH	SAMN38713244	14365	188	313	876	2	89	5	6	29
113	2022-02-25	HC	Human_infant	11	113HC11AL	SAMN38791261	10920	63	34	27	33	1095	36	6	86	A123
113	2022-02-25	HC	Human_infant	11	113HC11BL	SAMN38791260	10920	63	34	27	33	1095	36	6	87
113	2022-02-25	HC	Human_infant	11	113HC11CL	SAMN38791259	10920	63	34	27	33	1095	36	6	88
114	2022-02-03	HC	Human_infant	10	114HC10BL	SAMN38815204	2042	2	2	42	4	90	25	8	189	A123							A123_B12	1
114	2022-02-03	HC	Human_infant	10	114HC10AL	SAMN38815203	2042	2	2	42	4	90	25	8	190
114	2022-02-03	HC	Human_infant	10	114HC10CL	SAMN38815205	2042	2	2	42	4	90	25	8	191
114	2022-02-23	HC	Human_infant	11	114HC11AL	SAMN38183184	50	2	1	12	3	2	1	5	158	A12
114	2022-02-23	HC	Human_infant	11	114HC11BL	SAMN38183185	50	2	1	12	3	2	1	5	159
115	2022-02-03	HC	Human_infant	10	115HC10BL	SAMN38791263	50	2	1	12	3	2	1	5	262	A123
115	2022-02-03	HC	Human_infant	10	115HC10CL	SAMN38791262	50	2	1	12	3	2	1	5	263
115	2022-02-03	HC	Human_infant	10	115HC10AL	SAMN38791264	50	2	1	12	3	2	1	5	264
118	2021-06-04	LG	Chicken	1	118LG01AL	SAMN37735394	1723	8	17	2	2	11	12	6	5
119	2022-02-09	HC	Human_infant	10	119HC10AL	SAMN40619975	849	55	21	27	10	147	37	6	48	A123
119	2022-02-09	HC	Human_infant	10	119HC10CL	SAMN40619973	849	55	21	27	10	147	37	6	49
119	2022-02-09	HC	Human_infant	10	119HC10BL	SAMN40619974	849	55	21	27	10	147	37	6	50
120	2021-09-25	LG	Chicken	1	120LG01AL	SAMN37735403	49	3	1	5	17	11	11	6	213						A12
120	2021-09-25	LG	Chicken	1	120LG01BL	SAMN37735402	49	3	1	5	17	11	11	6	214
122	2022-02-12	LG	Chicken	2	122LG02AH	SAMN38713246	2031	9	17	5	10	11	3	3	91
122	2022-02-12	LC	Goat	2	122LC02AH	SAMN38842805	2031	9	17	5	10	11	3	3	92
122	2022-02-12	LO	Sheep	2	122LO02AH	SAMN38713247	50	2	1	12	3	2	1	5	153							A12
122	2022-02-12	LO	Sheep	2	122LO02BH	SAMN38713248	50	2	1	12	3	2	1	5	154
122	2022-04-06	HC	Human_infant	12	122HC12AL	SAMN38842804	824	9	2	2	2	11	5	6	53								A1_23	1
122	2022-05-06	HC	Human_infant	13	122HC13AL	SAMN37735431	824	9	2	2	2	11	5	6	51	A12
122	2022-05-06	HC	Human_infant	13	122HC13BL	SAMN37769212	824	9	2	2	2	11	5	6	52
123	2022-02-10	LG	Chicken	1	123LG01AL	SAMN40454884	14374	764	17	5	2	11	3	6	66
123	2022-02-12	HC	Human_infant	10	123HC10BL	SAMN38183194	1038	8	10	5	2	11	12	6	207
124	2021-12-08	HS	Human_sibling	2	124HS02BL	SAMN40454909	2304	2	4	5	25	11	3	5	60		A12
124	2021-12-08	HS	Human_sibling	2	124HS02CL	SAMN40454910	2304	2	4	5	25	11	3	5	61
124	2021-12-08	HC	Human_infant	8	124HC08BL	SAMN38816105	1038	8	10	5	2	11	12	6	208	A12							A12_B123	1
124	2021-12-08	HC	Human_infant	8	124HC08CL	SAMN38816106	1038	8	10	5	2	11	12	6	209								B123_C	4
124	2022-01-21	HC	Human_infant	9	124HC09CL	SAMN38183171	1365	24	2	2	15	23	3	12	172	A123
124	2022-01-21	HC	Human_infant	9	124HC09AL	SAMN38183169	1365	24	2	2	15	23	3	12	173
124	2022-01-21	HC	Human_infant	9	124HC09BL	SAMN38183170	1365	24	2	2	15	23	3	12	174
124	2022-05-07	HC	Human_infant	13	124HC13AL	SAMN40454863	14388	765	34	27	33	1095	36	6	89
125	2021-07-30	HC	Human_infant	3	125HC03AL	SAMN38791256	1038	8	10	5	2	11	12	6	200
126	2021-10-08	HC	Human_infant	5	126HC05CL	SAMN38791244	883	2	17	2	3	2	1	5	131	ABC							A1BC_A1D	2
126	2021-11-19	HC	Human_infant	5	126HC05AL	SAMN38791242	2042	2	2	42	4	90	25	8	181								A1D_A12	1
126	2022-01-13	HC	Human_infant	5	126HC05BL	SAMN38791217	305	9	53	2	10	11	3	3	229
126	2021-10-08	HC	Human_infant	7	126HC07BL	SAMN38791245	883	2	17	2	3	2	1	5	131	AB
126	2021-12-05	HC	Human_infant	7	126HC07CL	SAMN38791246	14424	166	2	1	10	151	1	1	149
126	2021-12-31	HC	Human_infant	8	126HC08CL	SAMN38816234	883	2	17	2	3	2	1	5	131	A12
126	2021-12-31	HC	Human_infant	8	126HC08BL	SAMN38816233	883	2	17	2	3	2	1	5	132
127	2021-11-14	LG	Chicken	1	127LG01BL	SAMN37735407	1723	8	17	2	2	11	12	6	166
127	2022-05-19	HC	Human_infant	13	127HC13AL	SAMN40454864	305	9	53	2	10	11	3	3	222	A12
127	2022-05-19	HC	Human_infant	13	127HC13BL	SAMN37735430	305	9	53	2	10	11	3	3	223
129	2022-03-02	LG	Chicken	1	129LG01AH	SAMN38712347	883	2	17	2	3	2	1	5	127
129	2022-03-02	HC	Human_infant	10	129HC10AL	SAMN40619999	883	2	17	2	3	2	1	5	128	A123
129	2022-03-02	HC	Human_infant	10	129HC10BL	SAMN40620000	883	2	17	2	3	2	1	5	129
129	2022-03-02	HC	Human_infant	10	129HC10CL	SAMN40620001	883	2	17	2	3	2	1	5	130
129	2022-04-20	HC	Human_infant	12	129HC12BH	SAMN38712345	849	55	21	27	10	147	37	6	42	A12							A123_B12	2
129	2022-04-20	HC	Human_infant	12	129HC12AH	SAMN40208061	849	55	21	27	10	147	37	6	43
132	2022-05-07	LC	Goat	1	132LC01AL	SAMN37735419	50	2	1	12	3	2	1	5	161
132	2022-05-07	LG	Chicken	1	132LG01BH	SAMN38712350	305	9	53	2	10	11	3	3	231						A123
132	2022-05-07	LG	Chicken	1	132LG01AH	SAMN38712349	305	9	53	2	10	11	3	3	232
132	2022-05-07	LG	Chicken	1	132LG01AL	SAMN40454862	305	9	53	2	10	11	3	3	233
132	2021-10-08	HC	Human_infant	8	132HC08AL	SAMN38791243	883	2	17	2	3	2	1	5	131	A12B							A12B_C12	2
132	2022-01-13	HC	Human_infant	8	132HC08BL	SAMN38791218	305	9	53	2	10	11	3	3	228								C12_D	3
132	2022-01-13	HC	Human_infant	8	132HC08CL	SAMN38791219	305	9	53	2	10	11	3	3	230
132	2022-03-04	HC	Human_infant	10	132HC10AL	SAMN38791214	19	2	1	5	3	2	1	5	113	A12B
132	2022-03-04	HC	Human_infant	10	132HC10CL	SAMN38791216	19	2	1	5	3	2	1	5	114
132	2022-05-25	HC	Human_infant	13	132HC13AL	SAMN37735428	14365	188	313	876	2	89	5	6	25
133	2022-03-29	LG	Chicken	1	133LG01BH	SAMN38712352	14365	188	313	876	2	89	5	6	26						A12
133	2022-03-29	LG	Chicken	1	133LG01AH	SAMN38712351	14365	188	313	876	2	89	5	6	28
133	2022-05-26	HC	Human_infant	13	133HC13AL	SAMN40454861	10920	63	34	27	33	1095	36	6	90
135	2021-12-19	LC	Goat	1	135LC01CL	SAMN40619988	2031	9	17	5	10	11	3	3	95
135	2021-12-19	LG	Chicken	1	135LG01AL	SAMN38713250	883	2	17	2	3	2	1	5	135
135	2022-02-09	HC	Human_infant	9	135HC09AL	SAMN38815043	19	2	1	5	3	2	1	5	112	A12
135	2022-02-09	HC	Human_infant	9	135HC09CL	SAMN38815288	19	2	1	5	3	2	1	5	118

## Sheet: Diversity
Pattern	HC_div	HS_div	HM_div	LB_div	LC_div	LG_div	LO_div	Total		Description
A1234	1	0	0	0	0	0	0	1		4 isolates with same lgST and 4 cgST
A123	25	1	1	0	0	1	0	28		3 isolates with same lgST and 3 cgST
A12	22	5	0	2	2	7	1	39		2 isolates with same lgST and 2 cgST
A12B	5	0	0	0	0	0	0	5		3 isolates, 2 same lgST and 2 cgST, 1 different lgST
AB	3	0	0	0	0	4	0	7		2 isolates with different lgST
ABC	1	0	0	0	0	0	0	1		3 isolates with different lgST
Total	57	6	1	2	2	12	1	81
73	samples with at least 2 cgST variants of the same lgST
68	samples with same ST and 2-4 cgST variants
8	samples with 2 or 3 lgST
Subtotals
No evidence	48	6	1	2	2	8	1	68
Evidence	9	0	0	0	0	4	0	13
%Evidence	0.842105	1	1	1	1	0.666667	1	0.839506

## Sheet: Sequential
Count of HC_seq	Column Labels						All time point differences
Row Labels	1	2	3	4	(blank)	Grand Total	Different lgST	Yes	No	Yes/No
A_B	1	1				2	Yes	2	0	0
A_B12	1					1	Yes	1	0	0
A_B123		1				1	Yes	1	0	0
A1_23	1					1	No	0	1	0
A12_B			2			2	Yes	2	0	0
A12_B123	2	2				4	Yes	4	0	0
A123_B		1	1			2	Yes	2	0	0
A123_B12	1	1				2	Yes	2	0	0
A123_B123			1			1	Yes	1	0	0
A12B_C12		1				1	Yes	1	0	0
A12B_C123		1				1	Yes	1	0	0
A1B1_A1B2		1				1	No	0	1	0
A1BC_A1D		1				1	Mixed	0	0	1
A1D_A12	1					1	Mixed	0	0	1
B_C123	1					1	Yes	1	0	0
B123_C				1		1	Yes	1	0	0
C12_D			1			1	Yes	1	0	0
C123_A1B		1				1	Yes	1	0	0
(blank)
Grand Total	8	11	5	1		25		21	2	2
								0.84	0.08	0.08
